# Supplementary figures and images for: Selections that isolate recombinant mitochondrial genomes in animals
Source: eLife journal article supplement (doi:10.7554/elife.07247), 2015-08-03

A)

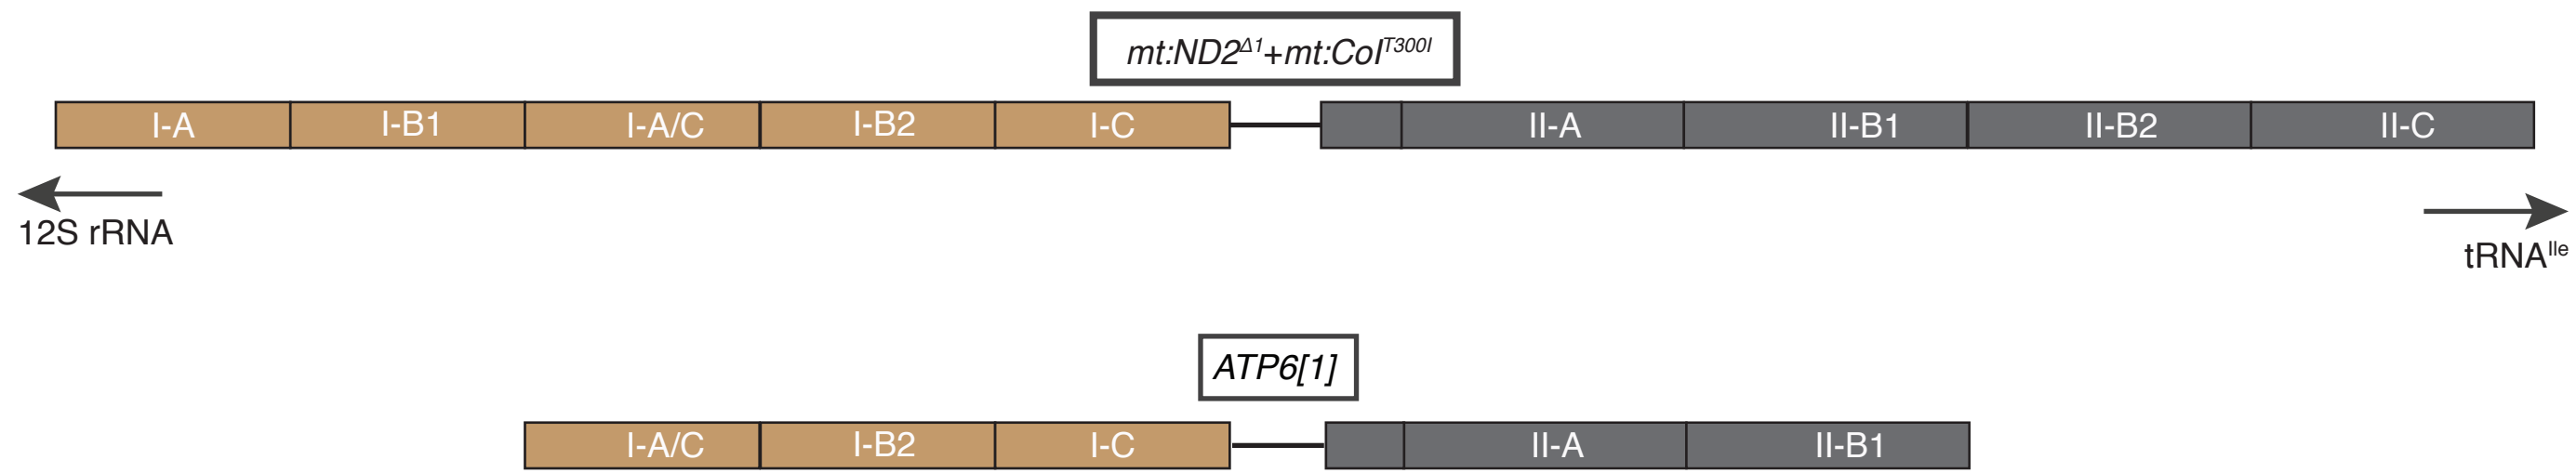

B)

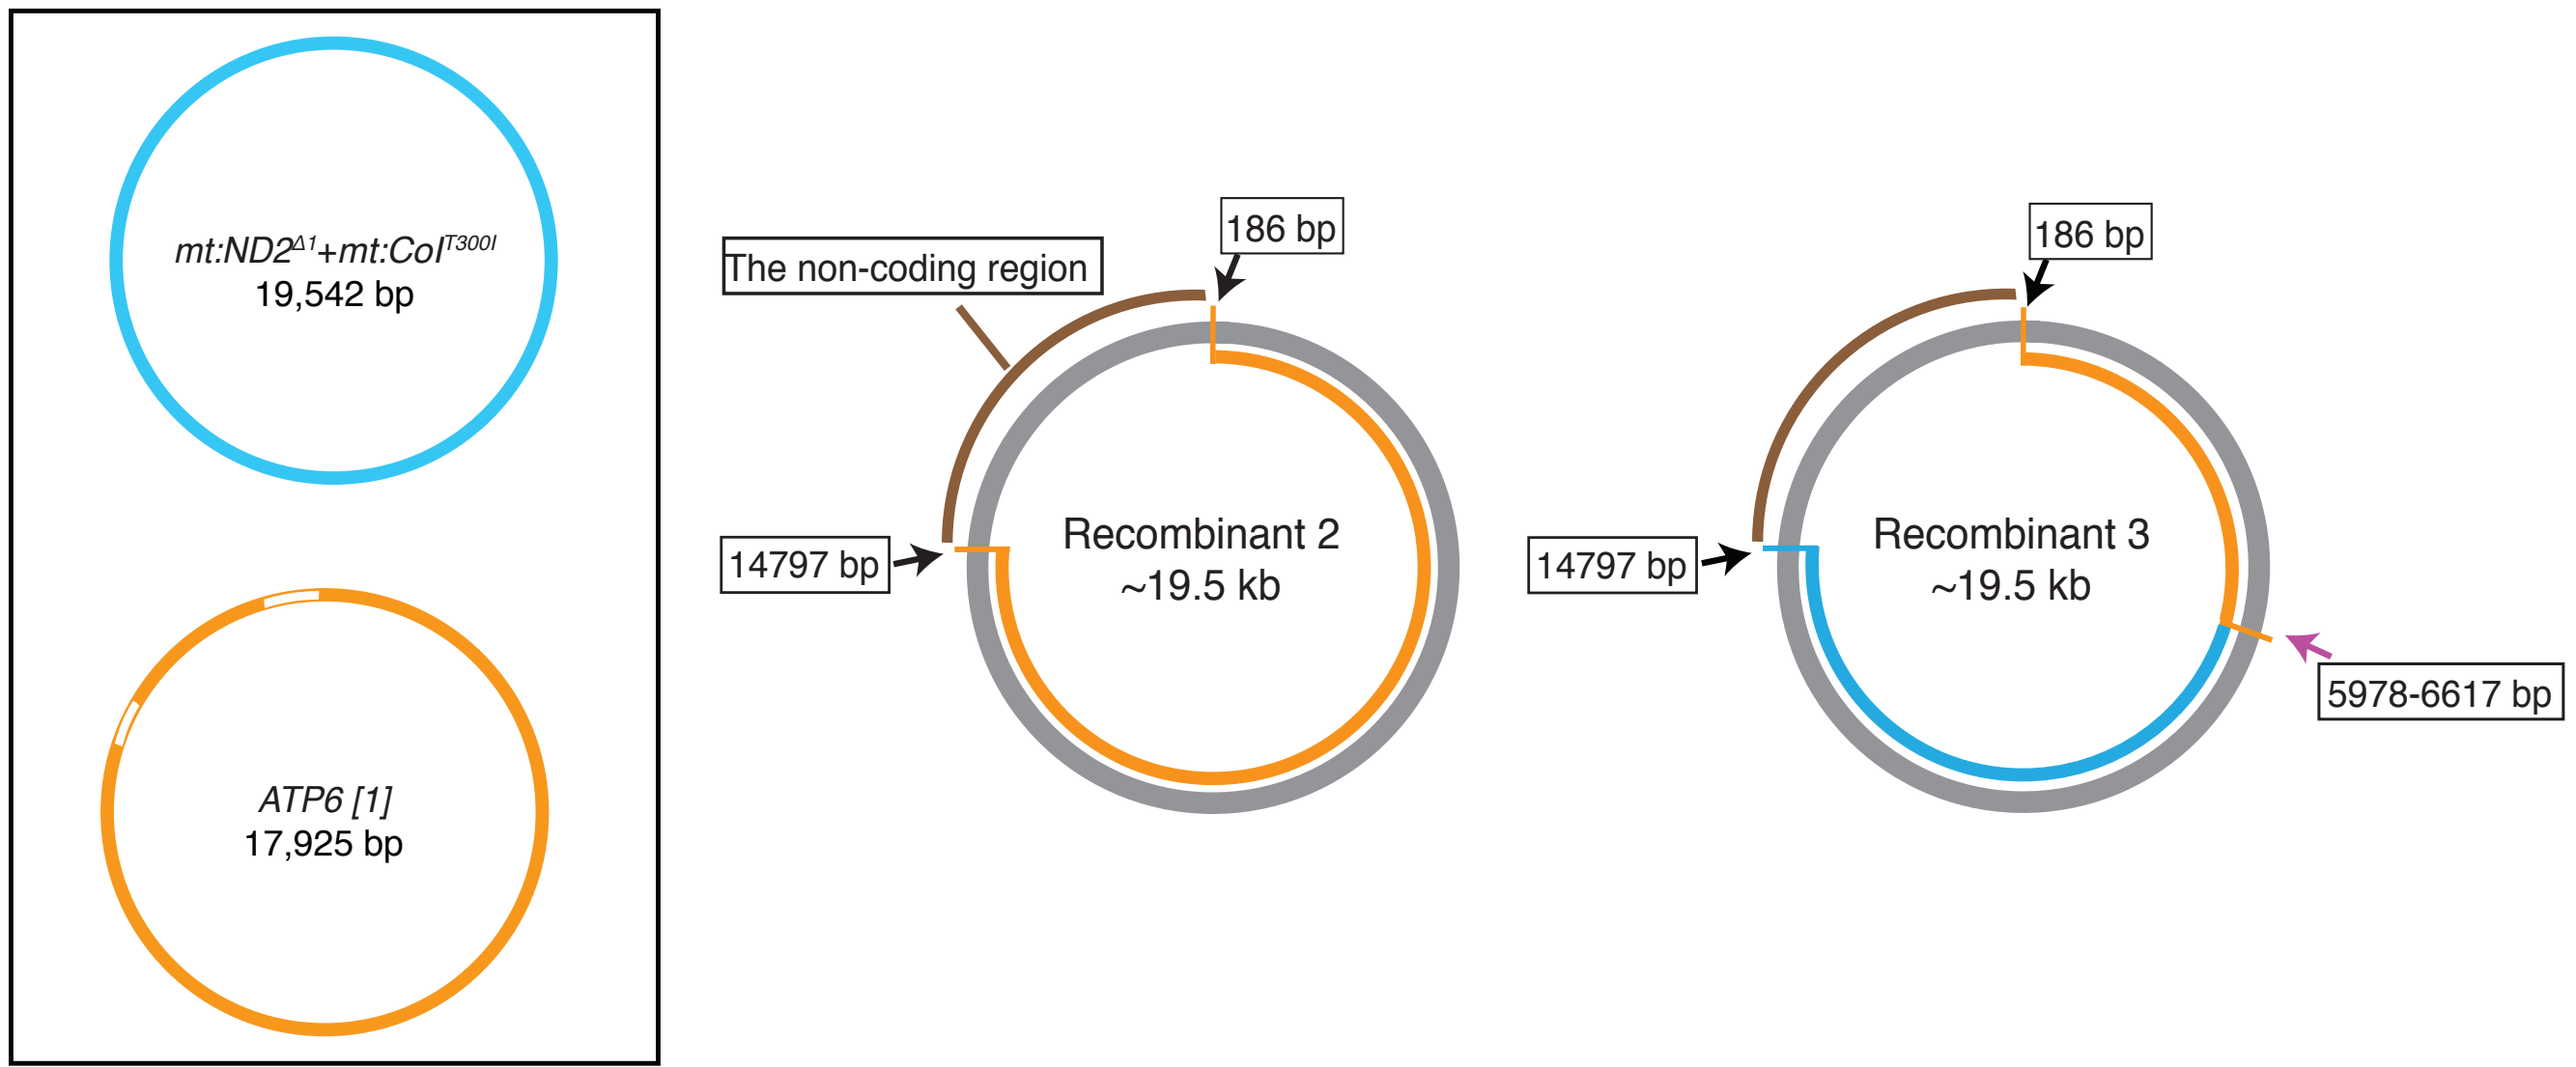

Supplement: supp [file elife-07247-supp-v1.zip]

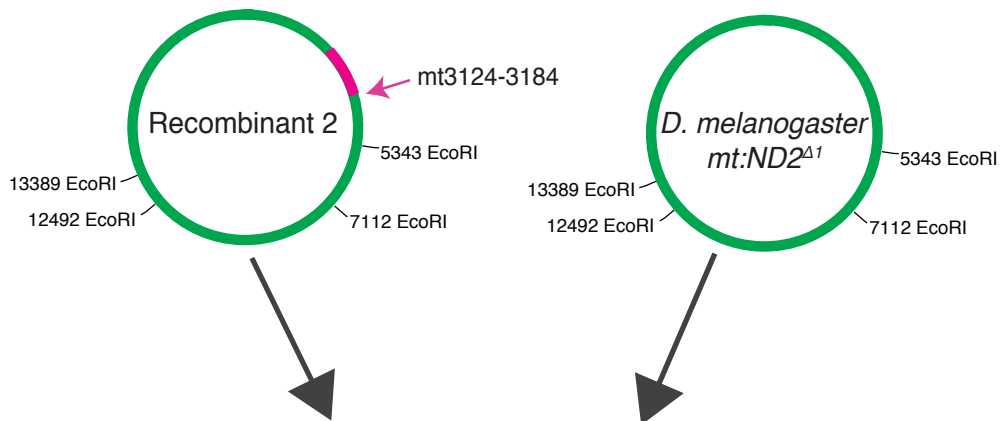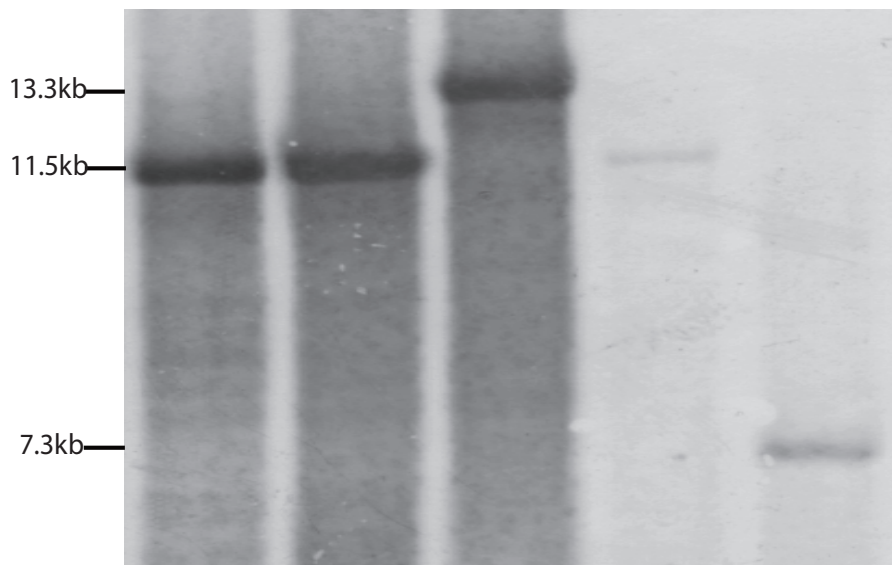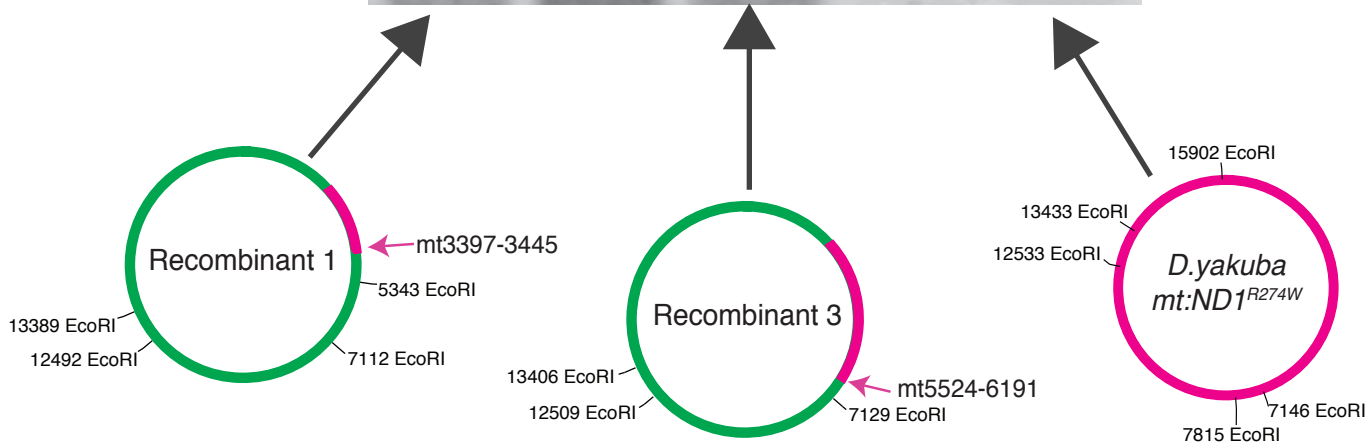

Supplement: supp [file elife-07247-supp-v1.zip]
